## Accelerometer tags: detecting and identifying activities in fish and the effect of sampling frequency

Franziska Broell, Takuji Noda, Serena Wright, Paolo Domenici, John Fleng Steffensen, Jean-Pierre Auclair and Christopher T. Taggart

10.1242/jeb.088336

There was an error published in *J. Exp. Biol.* **216**, 1255-1264.

The author affiliations for Paolo Domenici and John Fleng Steffensen were incorrectly displayed. The correct version is given below.

Franziska Broell<sup>1,\*</sup>, Takuji Noda<sup>2</sup>, Serena Wright<sup>3,4</sup>, Paolo Domenici<sup>5</sup>, John Fleng Steffensen<sup>6</sup>,  
Jean-Pierre Auclair<sup>1</sup> and Christopher T. Taggart<sup>1</sup>

<sup>1</sup>Department of Oceanography, Dalhousie University, 1355 Oxford Street, Halifax, NS, Canada, B3H 4R2, <sup>2</sup>Department of Social Informatics, Graduate School of Informatics, Kyoto University, Yoshidahonmachi, Kyoto 606-8501, Japan, <sup>3</sup>CEFAS Laboratory, Pakefield Road, Lowestoft NR3 0HT, UK, <sup>4</sup>Department of Biosciences and Geography, Swansea University, Singleton Park, Swansea SA2 8PP, UK, <sup>5</sup>CNR-IAMC, Istituto per l'Ambiente Marino Costiero, Località Sa Mardini, 09072 Torregrande-Oristano, Italy and <sup>6</sup>Marine Biological Laboratory, University of Copenhagen, Strandpromenaden 5, 3000 Helsingør, Denmark

\*Author for correspondence (franziskabroell@dal.ca)

We apologise to the authors and readers for any confusion that this error may have caused.
